# Supplementary material
Source: MDPI journal article supplement (https://www.mdpi.com/2075-163X/13/2/215)
Supplement: s1 [file s1]

## SUPPLEMENTARY INFORMATION

### Structural and geochemical assessment of the coralline alga *Tethysphytum antarcticum* from Terra Nova Bay, Ross Sea, Antarctica

Matthias López Correa, Sebastian Teichert, Federica Ragazzola, Salvador Cazorla Vázquez, Felix B. Engel, Katrin Hurle, Claudio Mazzoli, Piotr Kuklinski, Giancarlo Raiteri, Chiara Lombardi

#### Thin sections

Complementary to the SEM investigations, a further sample slice was cut perpendicular to the rock and algal crust, to examine the skeletal mineralogy and crystal orientation. In an EPOVAC chamber, the dry sample was vacuum-embedded in a two-component epoxy resin (Biresin L48 resin and hardener, 4:1), cured 48 hours, cut with a water-cooled PRESI Mecatome precision rock saw and grinded on a PRESI Minitech 300 SPI using diamond discs with 125  $\mu\text{m}$ , 75  $\mu\text{m}$ , 54  $\mu\text{m}$ , and 18  $\mu\text{m}$  graining. The surface was then glued with BIRESIN epoxy resin to a glass slide and ground to 20  $\mu\text{m}$  final thickness using a G&N MPS 2 R300. Sections were photographed in normal and polarized translucent light with a Zeiss Axio Zoom.V16, equipped with a Zeiss Plan-NEOFLUAR Z 1x/0.25 FWD 56 mm. The software Zeiss ZEN core 2.7.0 was used to produce high-resolution images via the tile stitching mode. All images were post-processed in Adobe Photoshop by means of sharpening, tonal value adjustment, and shadows/highlights adjustments.

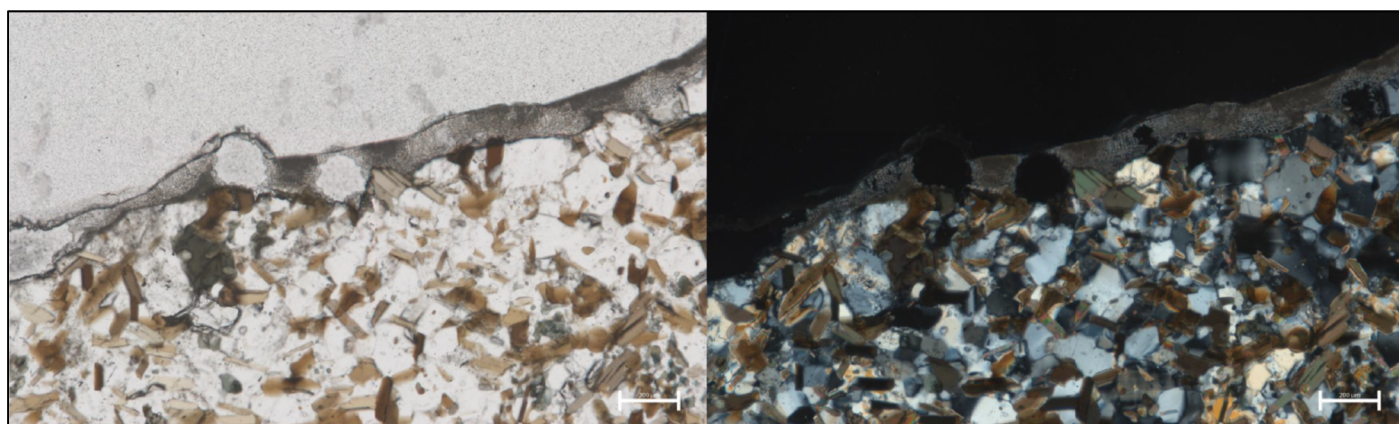

**Figure S1.** Thin section images with translucent light (left) and polarized light under crossed-nichols (right); the crystalline bedrock cobble is covered by a ~150  $\mu\text{m}$  thin veneer of the calcareous coralline red alga *Tethysphytum antarcticum*. Two large conceptacles (sporangial cavities) in the center are embedded in the monomerous thallus. Electron-Microprobe map 3 is located between them. Scale bars: 200  $\mu\text{m}$ .

#### $\mu$ Raman spectroscopy

The rock thin section was examined for its principal mineral composition at the University of Padova (Organic Chemistry Institute) with a ThermoScientific micro-Raman Spectroscope. The monochromatic 532 nm DXR laser was run at 3 mW laser power, with a 25  $\mu\text{m}$  aperture and a 50 $\times$  LWD objective. Four replicates were taken for each spot measurement, with 30 s dwell time and Raman shift acquired between 50 and 3500  $\text{cm}^{-1}$ , at 900 lines/mm grating. Data were processed, background corrected and visualized (Figure S2) with the OMNIC-software and compared to mineral reference spectra from the RRUFF-database (<http://rruff.info>). Principal peaks indicated orthoclase and phlogopite (Figure S2).

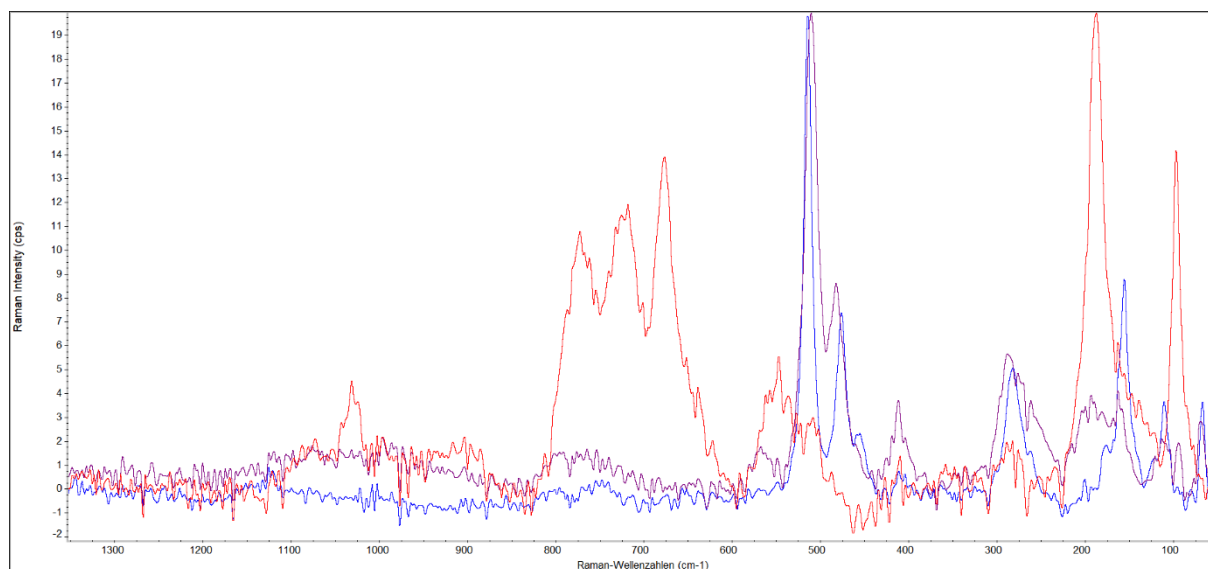

**Figure S2.** Raman spectra of two dominant minerals in the rock substrate beneath the algal crust are indicative of orthoclase (blue and purple) and phlogopite (red).

### X-ray powder diffractometry (XRD)

The XRD-diffractograms showed characteristic peaks for the (*hkl*)-surfaces at the  $2\Theta$  Cu  $K_{\alpha}$  angles as follows: (012) at  $23.22^{\circ}$ , (104) at  $29.63^{\circ}$ , (110) at  $36.23^{\circ}$ , (113) at  $39.70^{\circ}$ , (202) at  $43.47^{\circ}$ , (018) at  $47.89^{\circ}$ , (116) at  $48.88^{\circ}$ , (112) at  $57.84^{\circ}$ . Refined Rietfeld unit cell parameters *a*, *c* and cell volume are given along with calculated MgCO<sub>3</sub> (mol%) in Table S1. Calculations are based on regressions provided by Titschack et al. 2011 [42].

**Table S1.** Summarized unit cell parameters from Rietfeld refinement and MgCO<sub>3</sub> (mol%).

| Sample ID          | <i>a</i><br>(Å) | <i>c</i><br>(Å) | Volume<br>(Å <sup>3</sup> ) | Mg occ<br>refined | mol% MgCO <sub>3</sub><br>( <i>a</i> - based) | mol% MgCO <sub>3</sub><br>(volume - based) |
|--------------------|-----------------|-----------------|-----------------------------|-------------------|-----------------------------------------------|--------------------------------------------|
| Bulk powder 1      | 4.958           | 16.933          | 360.545                     | 12.08             | 8.30                                          | 7.96                                       |
| Bulk powder 2      | 4.958           | 16.930          | 360.390                     | 11.28             | 8.47                                          | 8.13                                       |
| Bulk powder 3      | 4.958           | 16.932          | 360.485                     | 10.35             | 8.36                                          | 8.03                                       |
| Average            | 4.958           | 16.932          | 360.473                     | 11.24             | 8.38                                          | 8.04                                       |
| Standard deviation | 0.0003          | 0.0011          | 0.0637                      | 0.0071            | 0.0007                                        | 0.0007                                     |

Table S2. Quantitative EMP-spot measurements.

| EMP-spot<br>main-thallus | Distance<br>(mm) | MgO<br>(weight%) | CaO<br>(weight%) | SrO<br>(weight%) | SO <sub>2</sub><br>(weight%) | CO <sub>2</sub><br>(weight%) | Mg/Ca<br>(mol/mol) | MgCO <sub>3</sub><br>(mol%) | Sr/Ca<br>(mol/mol) | SrCO <sub>3</sub><br>(mol%) | CaCO <sub>3</sub><br>(mol%) |
|--------------------------|------------------|------------------|------------------|------------------|------------------------------|------------------------------|--------------------|-----------------------------|--------------------|-----------------------------|-----------------------------|
| TNB-1                    | 0                | 3.266            | 51.676           | 0.239            | 0.598                        | 44.221                       | 0.0879             | 8.06                        | 0.0025             | 0.23                        | 91.71                       |
| TNB-2                    | 0.083            | 3.428            | 51.449           | 0.268            | 0.622                        | 44.233                       | 0.0927             | 8.46                        | 0.0028             | 0.26                        | 91.28                       |
| TNB-3                    | 0.255            | 3.786            | 51.085           | 0.216            | 0.597                        | 44.316                       | 0.1031             | 9.33                        | 0.0023             | 0.21                        | 90.46                       |
| TNB-4                    | 0.316            | 3.280            | 51.667           | 0.222            | 0.609                        | 44.223                       | 0.0883             | 8.10                        | 0.0023             | 0.21                        | 91.69                       |
| TNB-5                    | 0.390            | 2.907            | 52.032           | 0.284            | 0.647                        | 44.129                       | 0.0777             | 7.19                        | 0.0030             | 0.27                        | 92.53                       |
| TNB-6                    | 0.479            | 3.075            | 51.909           | 0.212            | 0.621                        | 44.184                       | 0.0824             | 7.60                        | 0.0022             | 0.20                        | 92.20                       |
| TNB-7                    | 0.543            | 3.015            | 52.031           | 0.176            | 0.577                        | 44.200                       | 0.0806             | 7.45                        | 0.0018             | 0.17                        | 92.38                       |
| TNB-8                    | 0.622            | 3.636            | 51.133           | 0.315            | 0.682                        | 44.233                       | 0.0990             | 8.98                        | 0.0033             | 0.30                        | 90.72                       |
| TNB-10                   | 0.717            | 1.468            | 53.855           | 0.190            | 0.538                        | 43.948                       | 0.0379             | 3.65                        | 0.0019             | 0.18                        | 96.17                       |
| TNB-11                   | 0.745            | 2.177            | 53.085           | 0.154            | 0.480                        | 44.103                       | 0.0571             | 5.39                        | 0.0016             | 0.15                        | 94.46                       |
| TNB-12                   | 0.858            | 3.710            | 51.206           | 0.238            | 0.509                        | 44.337                       | 0.1008             | 9.14                        | 0.0025             | 0.23                        | 90.64                       |
| TNB-13                   | 0.894            | 3.307            | 51.676           | 0.185            | 0.590                        | 44.243                       | 0.0890             | 8.16                        | 0.0019             | 0.18                        | 91.66                       |
| TNB-14                   | 0.927            | 3.099            | 51.952           | 0.142            | 0.592                        | 44.215                       | 0.0830             | 7.65                        | 0.0015             | 0.14                        | 92.21                       |
| TNB-15                   | 1.146            | 3.030            | 52.086           | 0.102            | 0.553                        | 44.228                       | 0.0809             | 7.48                        | 0.0011             | 0.10                        | 92.42                       |
| TNB-16                   | 1.190            | 3.520            | 51.327           | 0.317            | 0.577                        | 44.259                       | 0.0954             | 8.68                        | 0.0033             | 0.30                        | 91.01                       |
| TNB-17                   | 1.246            | 3.135            | 51.865           | 0.217            | 0.565                        | 44.218                       | 0.0841             | 7.74                        | 0.0023             | 0.21                        | 92.05                       |
| TNB-18                   | 1.379            | 3.248            | 52.060           | 0.036            | 0.240                        | 44.417                       | 0.0868             | 7.98                        | 0.0004             | 0.03                        | 91.98                       |
| TNB-19                   | 1.418            | 2.902            | 52.186           | 0.301            | 0.360                        | 44.251                       | 0.0774             | 7.16                        | 0.0031             | 0.29                        | 92.55                       |
| TNB-20                   | 1.546            | 2.819            | 52.441           | 0.057            | 0.427                        | 44.256                       | 0.0748             | 6.95                        | 0.0006             | 0.05                        | 92.99                       |
| TNB-21                   | 2.254            | 3.940            | 50.955           | 0.327            | 0.349                        | 44.429                       | 0.1076             | 9.68                        | 0.0035             | 0.31                        | 90.00                       |
| TNB-22                   | 2.371            | 3.764            | 51.286           | 0.255            | 0.229                        | 44.467                       | 0.1021             | 9.24                        | 0.0027             | 0.24                        | 90.51                       |
| TNB-23                   | 2.418            | 2.412            | 52.710           | 0.182            | 0.620                        | 44.076                       | 0.0637             | 5.98                        | 0.0019             | 0.17                        | 93.85                       |
| TNB-25                   | 2.742            | 3.401            | 51.480           | 0.307            | 0.567                        | 44.245                       | 0.0919             | 8.39                        | 0.0032             | 0.29                        | 91.31                       |
| TNB-26                   | 2.789            | 3.124            | 51.841           | 0.330            | 0.470                        | 44.235                       | 0.0839             | 7.71                        | 0.0034             | 0.32                        | 91.97                       |
| TNB-28                   | 3.067            | 3.083            | 51.871           | 0.285            | 0.567                        | 44.194                       | 0.0827             | 7.62                        | 0.0030             | 0.27                        | 92.11                       |
| TNB-29                   | 3.169            | 2.431            | 52.778           | 0.261            | 0.345                        | 44.185                       | 0.0641             | 6.01                        | 0.0027             | 0.25                        | 93.74                       |
| TNB-30                   | 3.300            | 3.756            | 51.282           | 0.182            | 0.358                        | 44.423                       | 0.1019             | 9.23                        | 0.0019             | 0.17                        | 90.59                       |
| TNB-31                   | 3.422            | 2.525            | 52.623           | 0.206            | 0.504                        | 44.142                       | 0.0668             | 6.25                        | 0.0021             | 0.20                        | 93.55                       |
| TNB-32                   | 3.579            | 3.328            | 51.586           | 0.387            | 0.415                        | 44.283                       | 0.0898             | 8.21                        | 0.0041             | 0.37                        | 91.42                       |
| TNB-33                   | 3.715            | 4.035            | 50.846           | 0.207            | 0.515                        | 44.397                       | 0.1104             | 9.92                        | 0.0022             | 0.20                        | 89.88                       |
| TNB-34                   | 3.801            | 2.740            | 52.366           | 0.187            | 0.542                        | 44.166                       | 0.0728             | 6.77                        | 0.0019             | 0.18                        | 93.05                       |
| TNB-35                   | 4.075            | 4.015            | 50.882           | 0.183            | 0.527                        | 44.393                       | 0.1098             | 9.88                        | 0.0019             | 0.18                        | 89.95                       |
| TNB-36                   | 4.242            | 3.770            | 51.193           | 0.155            | 0.523                        | 44.358                       | 0.1025             | 9.28                        | 0.0016             | 0.15                        | 90.57                       |
| TNB-37                   | 4.342            | 4.148            | 50.635           | 0.321            | 0.495                        | 44.402                       | 0.1140             | 10.20                       | 0.0034             | 0.31                        | 89.49                       |
| TNB-38                   | 4.535            | 4.266            | 50.579           | 0.276            | 0.410                        | 44.469                       | 0.1174             | 10.48                       | 0.0030             | 0.26                        | 89.26                       |
| TNB-39                   | 4.655            | 3.224            | 51.732           | 0.274            | 0.534                        | 44.235                       | 0.0867             | 7.96                        | 0.0029             | 0.26                        | 91.78                       |
| TNB-41                   | 4.888            | 3.174            | 51.716           | 0.334            | 0.582                        | 44.193                       | 0.0854             | 7.84                        | 0.0035             | 0.32                        | 91.84                       |
| TNB-43                   | 5.065            | 1.784            | 53.454           | 0.174            | 0.617                        | 43.971                       | 0.0464             | 4.43                        | 0.0018             | 0.17                        | 95.40                       |
| TNB-45                   | 5.336            | 3.491            | 51.390           | 0.334            | 0.503                        | 44.283                       | 0.0945             | 8.61                        | 0.0035             | 0.32                        | 91.07                       |
| TNB-46                   | 5.515            | 1.988            | 53.358           | 0.111            | 0.450                        | 44.092                       | 0.0518             | 4.92                        | 0.0011             | 0.11                        | 94.97                       |
| TNB-47                   | 5.600            | 3.006            | 52.062           | 0.239            | 0.452                        | 44.241                       | 0.0803             | 7.42                        | 0.0025             | 0.23                        | 92.35                       |
| TNB-48                   | 5.800            | 3.729            | 51.171           | 0.212            | 0.569                        | 44.319                       | 0.1014             | 9.19                        | 0.0022             | 0.20                        | 90.61                       |
| TNB-49                   | 5.945            | 4.585            | 50.232           | 0.243            | 0.410                        | 44.531                       | 0.1270             | 11.24                       | 0.0026             | 0.23                        | 88.53                       |
| TNB-50                   | 6.101            | 3.471            | 51.479           | 0.291            | 0.444                        | 44.314                       | 0.0938             | 8.55                        | 0.0031             | 0.28                        | 91.17                       |
| TNB-51                   | 6.203            | 3.811            | 51.060           | 0.277            | 0.503                        | 44.349                       | 0.1038             | 9.38                        | 0.0029             | 0.26                        | 90.35                       |
| TNB-52                   | 6.301            | 2.503            | 52.568           | 0.276            | 0.548                        | 44.105                       | 0.0663             | 6.20                        | 0.0028             | 0.27                        | 93.54                       |
| TNB-53                   | 6.422            | 3.467            | 51.483           | 0.297            | 0.438                        | 44.315                       | 0.0937             | 8.54                        | 0.0031             | 0.28                        | 91.17                       |
| TNB-54                   | 6.586            | 1.996            | 53.430           | 0.089            | 0.337                        | 44.148                       | 0.0520             | 4.94                        | 0.0009             | 0.09                        | 94.98                       |
| TNB-55                   | 6.722            | 3.042            | 52.166           | 0.071            | 0.430                        | 44.291                       | 0.0811             | 7.50                        | 0.0007             | 0.07                        | 92.43                       |
| TNB-56                   | 6.812            | 2.772            | 52.234           | 0.302            | 0.544                        | 44.148                       | 0.0738             | 6.86                        | 0.0031             | 0.29                        | 92.85                       |
| TNB-57                   | 6.954            | 2.203            | 52.967           | 0.127            | 0.676                        | 44.027                       | 0.0579             | 5.46                        | 0.0013             | 0.12                        | 94.41                       |
| TNB-58                   | 7.131            | 3.511            | 51.471           | 0.201            | 0.505                        | 44.312                       | 0.0949             | 8.65                        | 0.0021             | 0.19                        | 91.16                       |
| TNB-60                   | 7.277            | 3.947            | 50.898           | 0.259            | 0.532                        | 44.364                       | 0.1079             | 9.72                        | 0.0028             | 0.25                        | 90.04                       |
| TNB-61                   | 7.417            | 3.669            | 51.314           | 0.178            | 0.486                        | 44.352                       | 0.0995             | 9.03                        | 0.0019             | 0.17                        | 90.80                       |
| TNB-62                   | 7.517            | 3.449            | 51.694           | 0.061            | 0.437                        | 44.360                       | 0.0928             | 8.49                        | 0.0006             | 0.06                        | 91.45                       |
| basal-thallus            |                  |                  |                  |                  |                              |                              |                    |                             |                    |                             |                             |
| TNB-9                    | 0.674            | 4.173            | 50.373           | 0.216            | 1.057                        | 44.180                       | 0.1153             | 10.31                       | 0.0023             | 0.21                        | 89.48                       |
| TNB-40                   | 4.731            | 4.973            | 49.739           | 0.311            | 0.382                        | 44.596                       | 0.1391             | 12.18                       | 0.0034             | 0.30                        | 87.53                       |

|          |       |       |        |       |       |        |        |       |        |      |       |
|----------|-------|-------|--------|-------|-------|--------|--------|-------|--------|------|-------|
| TNB-42   | 4.962 | 5.207 | 49.149 | 0.358 | 0.878 | 44.408 | 0.1474 | 12.80 | 0.0039 | 0.34 | 86.85 |
| TNB-44   | 5.153 | 5.059 | 49.496 | 0.190 | 0.806 | 44.449 | 0.1422 | 12.43 | 0.0021 | 0.18 | 87.39 |
| TNB-64   | 7.696 | 4.524 | 50.017 | 0.219 | 0.955 | 44.285 | 0.1259 | 11.16 | 0.0024 | 0.21 | 88.63 |
| outliers |       |       |        |       |       |        |        |       |        |      |       |
| TNB-24   | 2.652 | 0.170 | 55.435 | 0.123 | 0.530 | 43.742 | 0.0043 | 0.42  | 0.0012 | 0.12 | 99.46 |
| TNB-27   | 2.982 | 0.354 | 55.293 | 0.078 | 0.462 | 43.812 | 0.0089 | 0.88  | 0.0008 | 0.08 | 99.04 |
| TNB-59   | 7.210 | 0.242 | 55.652 | 0.045 | 0.104 | 43.957 | 0.0061 | 0.60  | 0.0004 | 0.04 | 99.36 |
| TNB-63   | 7.664 | 0.239 | 54.350 | 1.267 | 0.694 | 43.451 | 0.0061 | 0.60  | 0.0126 | 1.24 | 98.16 |

### Algal architecture

The vegetative plant tissue of the alga *Thetysphytum antarcticum* features a thallus, that is made up of a basal thallus that infills the uneven surface topography of the lithic substrate, and a main thallus above (Figure S3). Reproductive spore bearing chambers, called conceptacles occur within the main-thallus (Figure S3A). The basal layer is constructed by box-shaped cells, which can occur as pure organic to poorly calcified and as strongly calcified with the entire cell lumen filled by calcite. In EMP-maps (e.g., Figures 8 and 9), the organic parts contain high levels of sulfur, low levels of Ca, but no Mg. Instead, the blocky calcified part (Figure S3B) contains high levels of sulfur, high-levels of magnesium and high-levels of calcium (see EMP-map 1 in Figure 8).

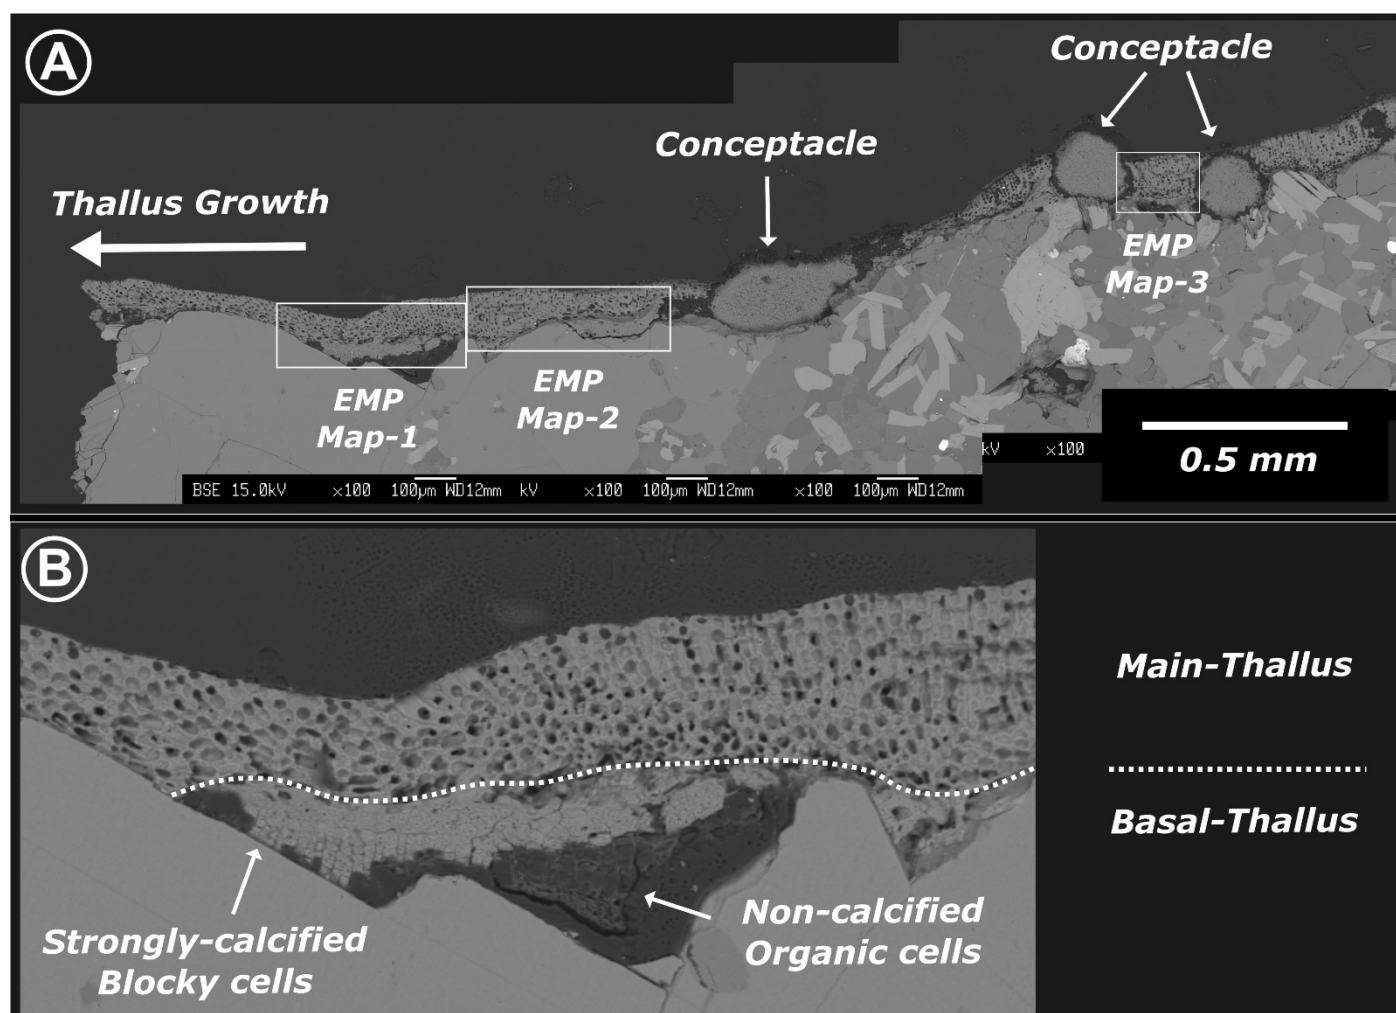

**Figure S3.** Basic architecture of the calcareous coralline alga *Thetysphytum antarcticum* with conceptacles interspersed within the thallus (A), and a clear separation of a basal thallus and the main-thallus above (B). The basal layer consists of box shaped organic cells with varying degrees of high-Mg calcite infilling.
